# Supplementary material
Source: PubMed Central journal article supplement (PMC3423811)

SUPPLEMENTARY DATA

FIG. S1. Changes in the F-actin cytoskeleton of pollen tubes during the *in vivo* SI response. (A–H) Confocal image stack of phalloidin-stained pollen tubes in compatibly and incompatibly pollinated pistils. The corresponding bright fields are shown. The times after pollination are indicated below the images. Bars = 10  $\mu$ m.

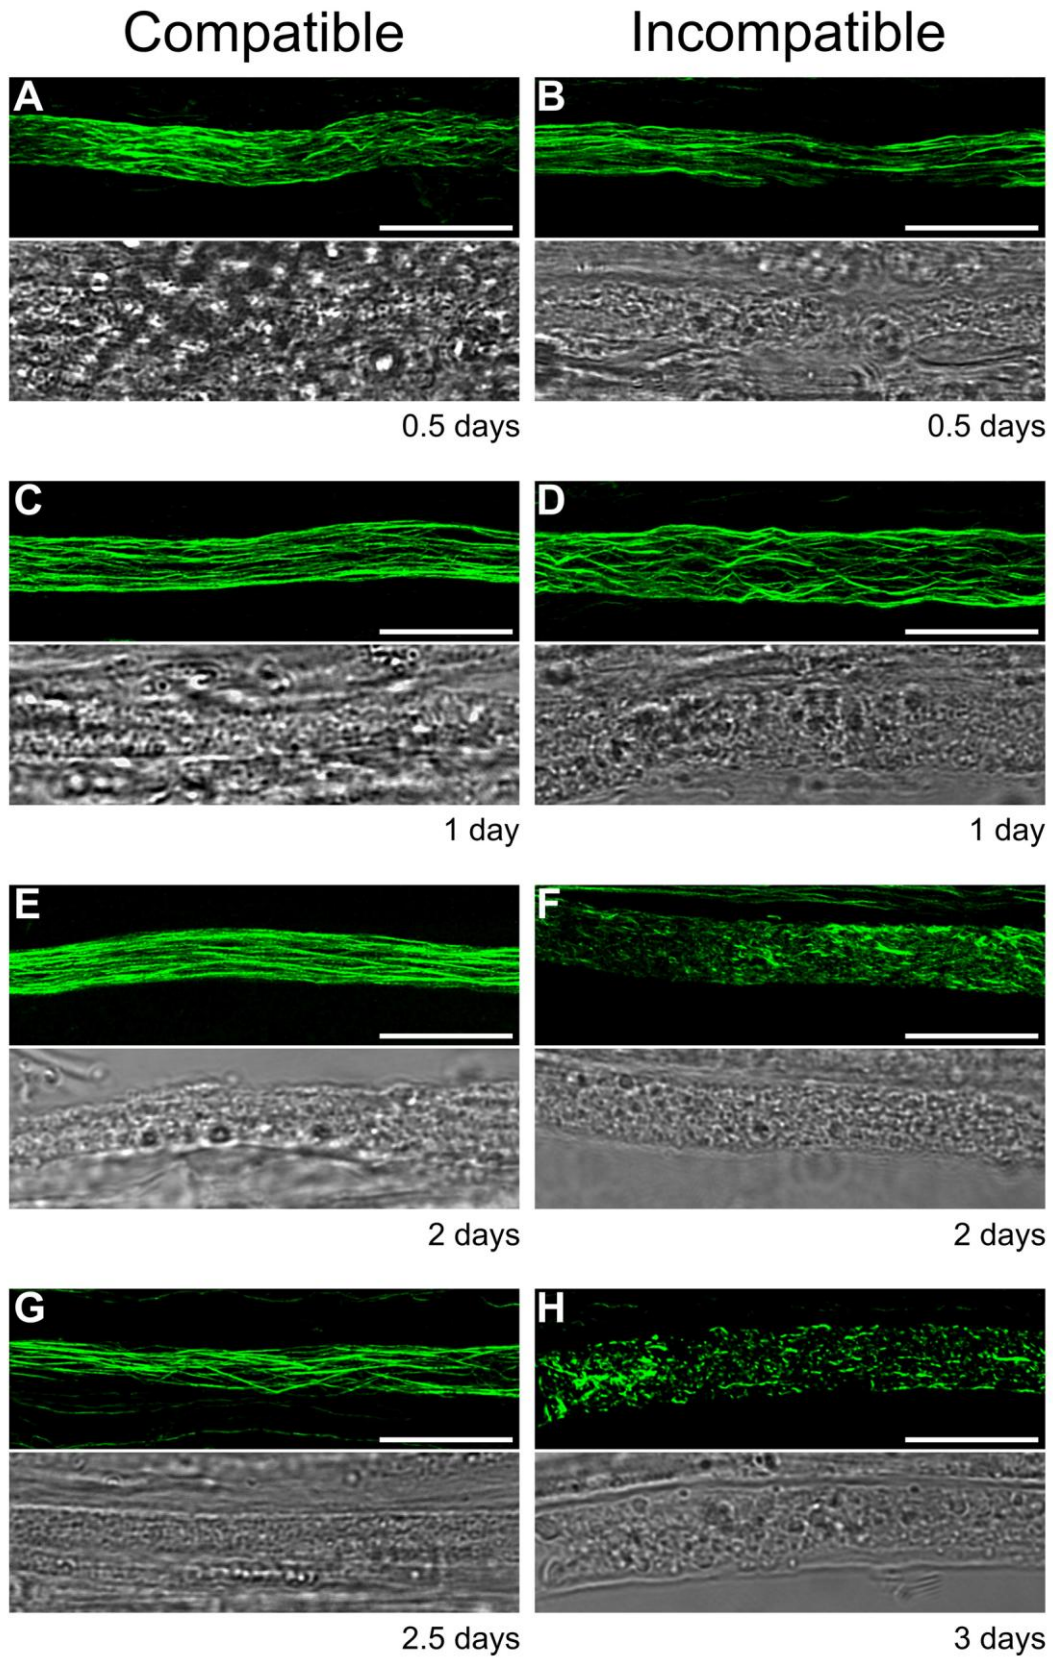

FIG. S2. Punctate foci of actin in incompatible pollen tubes. The section of an incompatibly pollinated style collected by day eight after pollination was stained with Alexa 488-phalloidin. A (top panel) Median optical section showing actin accumulation in the cortical region of pollen tube; (central panel) Full projection showing punctate actin; (bottom panel) Bright field. (B) Quantification of the pattern of F-actin alterations. White, organized actin; Dark grey, disorganized actin; Light grey, punctate actin. Seventy five pollen tubes were examined in each experiment. The values are the average  $\pm$  s.d. for at least two independent experiments.

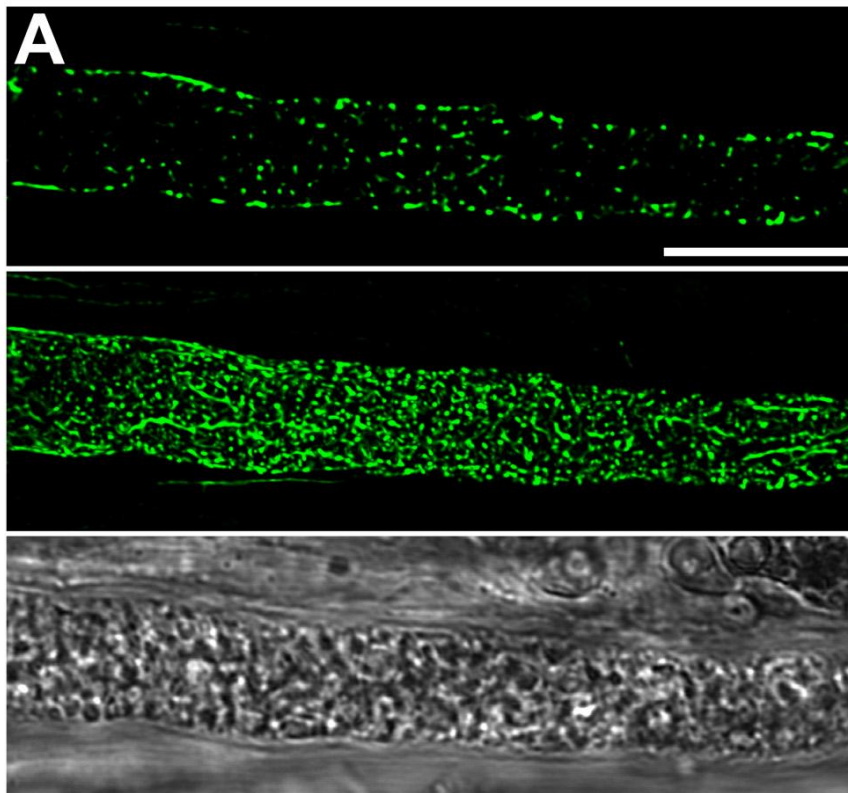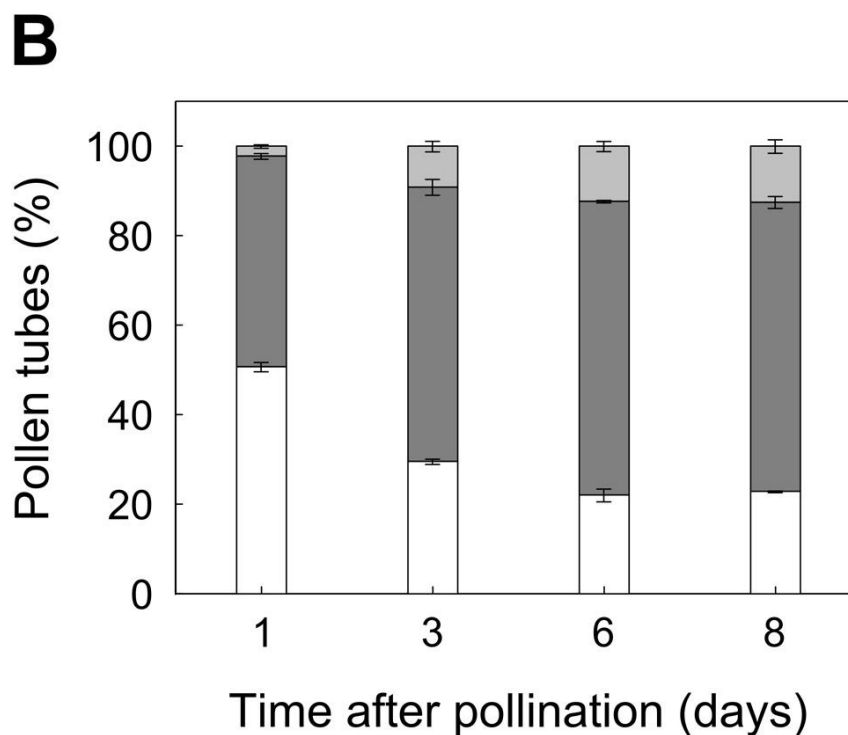

FIG. S3. Morphological diversity of pollen tube vacuoles. Sections of compatibly pollinated pistils were immunolabeled with anti-callose (green) and anti-vPPase (red) antibodies. (A), (B) and (C) show different patterns of vacuole in pollen tubes. The corresponding bright fields are shown.

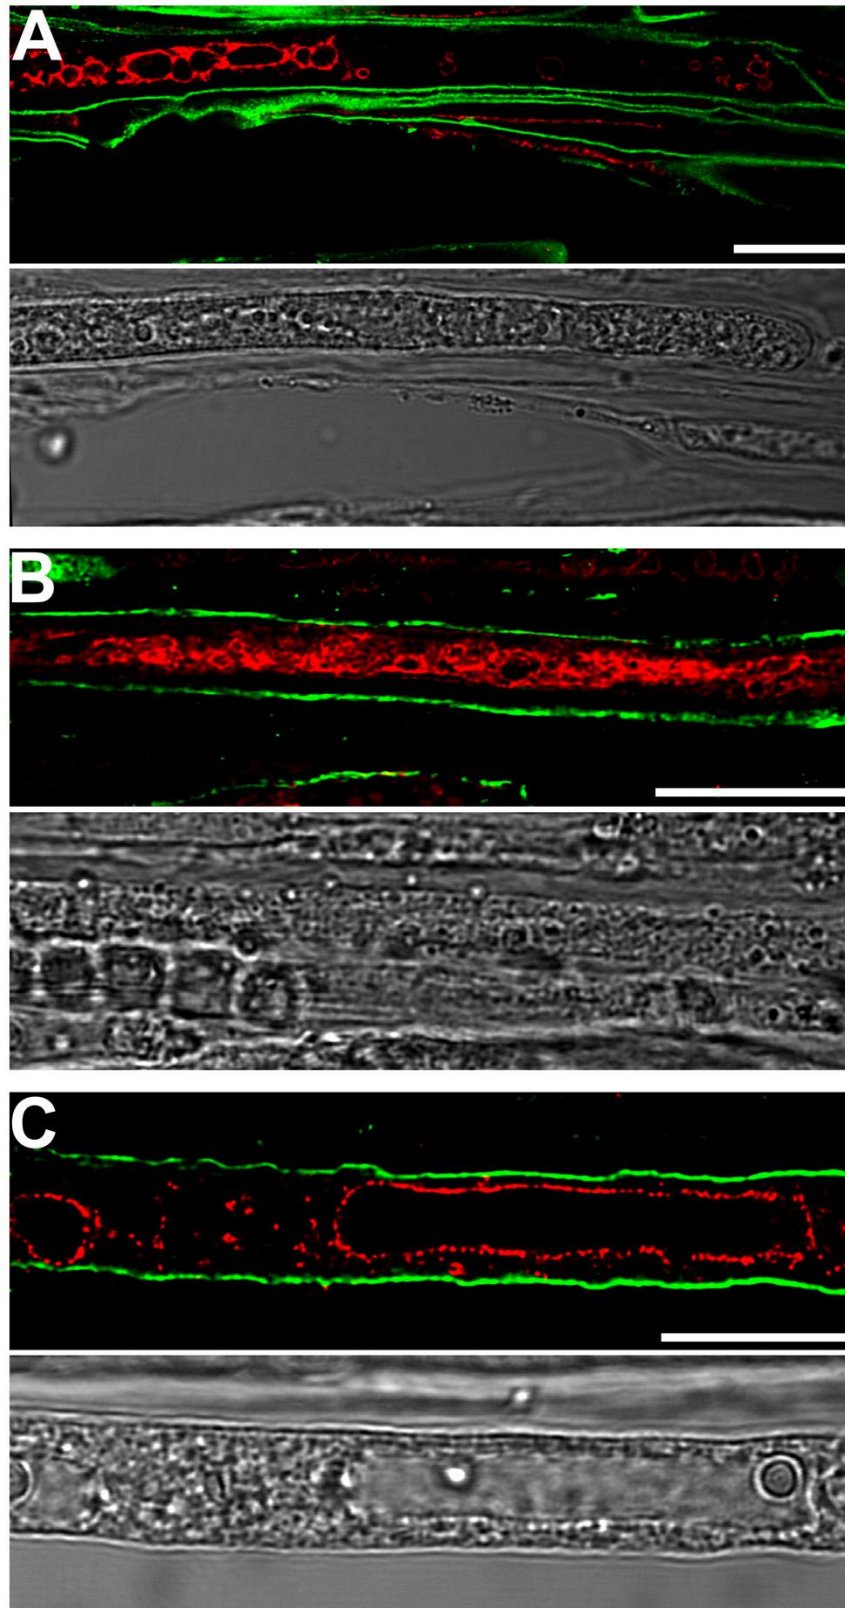

Supplement: supp_mcs153_mcs153supp.pdf [file supp_mcs153_mcs153supp.pdf]
